# Supplementary material
Source: PubMed Central journal article supplement (PMC5011823)

**A**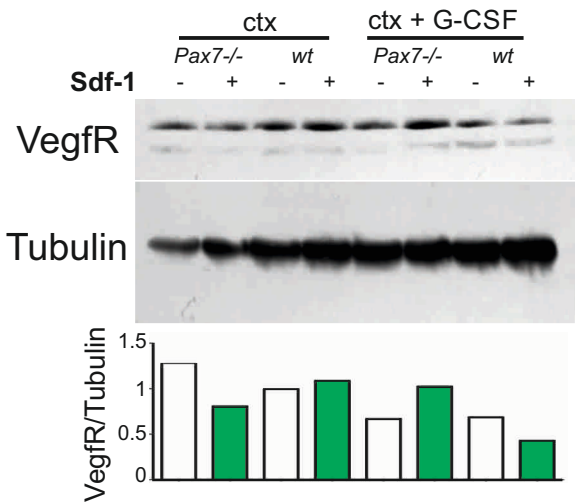**B**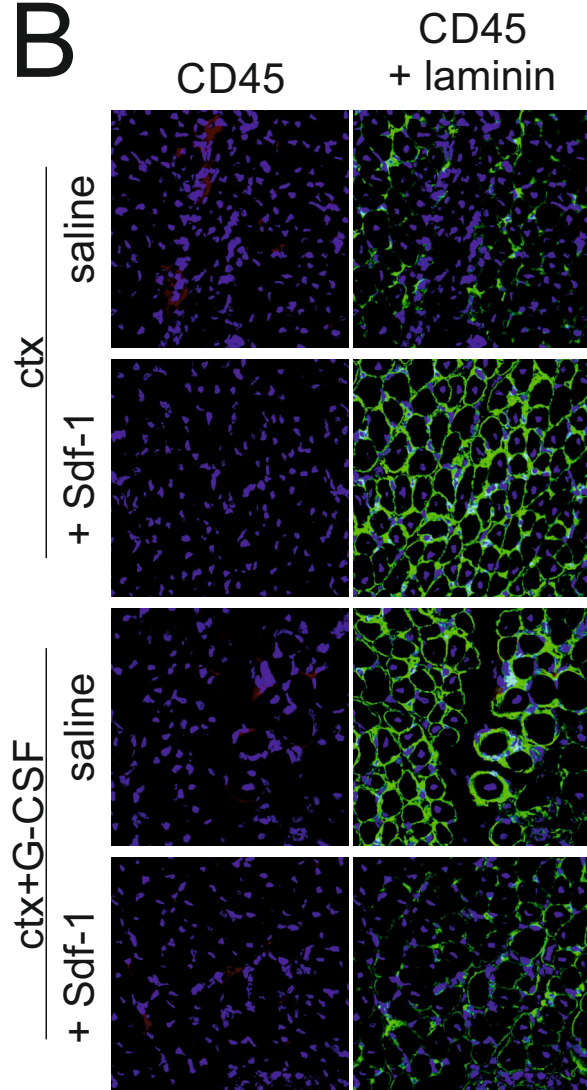

Supplement: JCSM-7-483-s001.pdf [file JCSM-7-483-s001.pdf]
